# Supplementary material for: Statins are associated with a large reduction in all-cause mortality in women from a cardiac outpatient population
Source: HighWire-hosted journal article supplement (doi:10.1136/openhrt-2021-001900), 2022-04-01
Supplement: openhrt-2021-001900supp001_data_supplement.pdf [file openhrt-2021-001900supp001_data_supplement.pdf]

## Supplementary data

| Lower intensity      | Equal intensity    | Higher intensity      |
|----------------------|--------------------|-----------------------|
| Atorvastatin 5 mg    | Atorvastatin 10 mg | Atorvastatin > 10 mg  |
| Fluvastatin any dose |                    | Rosuvastatin > 2.5 mg |
| Pravastatin any dose |                    | Simvastatin > 40 mg   |
| Rosuvastatin 2.5 mg  |                    |                       |
| Simvastatin < 40 mg  |                    |                       |

Supplementary Table 1 Classification of statin regimens as lower, equal or higher intensity depending on how much they lower low-density lipoprotein cholesterol levels compared to the Dutch guideline recommended 40mg simvastatin (37% lowering)

| Variable                                         | Additional sub-classifications                                                                          |
|--------------------------------------------------|---------------------------------------------------------------------------------------------------------|
| Sex                                              |                                                                                                         |
| Age                                              |                                                                                                         |
| Cardiovascular diagnosis at baseline             | Heart failure<br>Coronary heart disease<br>Cardiovascular intervention<br>Cerebrovascular<br>Congenital |
| Ethnicity                                        |                                                                                                         |
| Personal income                                  |                                                                                                         |
| Height                                           |                                                                                                         |
| Weight                                           |                                                                                                         |
| Body mass index                                  |                                                                                                         |
| Systolic blood pressure                          |                                                                                                         |
| Diastolic blood pressure                         |                                                                                                         |
| Complaints at baseline                           | Chest pain<br>Dyspnoea<br>Fatigue<br>Heart murmur<br>Palpitations<br>Collapse                           |
| Number of complaints at baseline                 |                                                                                                         |
| Comorbidities at baseline                        | Diabetes mellitus<br>Hypertension<br>Dyslipidaemia                                                      |
| Current smoker                                   |                                                                                                         |
| Total cholesterol                                |                                                                                                         |
| High-density lipoprotein cholesterol             |                                                                                                         |
| Low-density lipoprotein cholesterol              |                                                                                                         |
| Creatinine                                       |                                                                                                         |
| Estimated glomerular filtration rate             |                                                                                                         |
| Triglycerides                                    |                                                                                                         |
| History of cardiovascular medication             |                                                                                                         |
| Cardiovascular medication prescribed at baseline | Blood-pressure lowering<br>Antiplatelet or anticoagulation<br>Lipid-lowering other than statins         |

|                                    |                                                             |
|------------------------------------|-------------------------------------------------------------|
|                                    | Diabetes mellitus<br>Nitrates<br>Anti-arrhythmic<br>Digoxin |
| Number of medication prescriptions |                                                             |
| Baseline appointment after 2016    |                                                             |

Supplementary Table 2

List of variables included in the propensity score

|                                               | Statin users<br>(n = 17,008) | Statin non-users<br>(n = 30,793) | Statin users<br>after matching<br>(n =8631) | Statin non-users<br>after matching<br>(n =8631) |
|-----------------------------------------------|------------------------------|----------------------------------|---------------------------------------------|-------------------------------------------------|
| <b>General characteristics</b>                |                              |                                  |                                             |                                                 |
| Age (years)                                   | 62 (11)                      | 55 (13)                          | 61 (11)                                     | 61 (13)                                         |
| Women (n, %)                                  | 8171 (48.0)                  | 17,427 (56.6)                    | 4482 (51.9)                                 | 4499 (52.1)                                     |
| Ethnicity (n, %)                              |                              |                                  |                                             |                                                 |
| Native Dutch                                  | 13,204 (77.6)                | 23,740 (77.1)                    | 6753 (78.2)                                 | 6841 (79.3)                                     |
| First generation immigrant                    | 1731 (16.1)                  | 4563 (14.8)                      | 1297 (15.0)                                 | 1200 (13.9)                                     |
| Second generation immigrant                   | 1073 (6.3)                   | 2490 (8.1)                       | 581 (6.7)                                   | 590 (6.8)                                       |
| Annual personal income (€)                    | 26,757 [14,647-46,066]       | 30,404 [15,679-50,823]           | 27,860 [14,647-48,390]                      | 28,261 [14,956-47,613]                          |
| Current smoker (n, %)                         | 6239 (36.7)                  | 12,207 (39.6)                    | 3543 (41.0)                                 | 3540 (41.0)                                     |
| 10-year cardiovascular mortality risk (SCORE) |                              |                                  |                                             |                                                 |
| 0-4%                                          | 5560 (32.7)                  | 19,736 (64.1)                    | 4757 (55.1)                                 | 4562 (52.9)                                     |
| 5-9%                                          | 3237 (19.0)                  | 4883 (15.9)                      | 2380 (27.6)                                 | 2175 (25.2)                                     |
| ≥10%                                          | 2198 (12.9)                  | 3137 (9.9)                       | 1493 (17.3)                                 | 1887 (21.9)                                     |
| <b>Complaints (n, %)</b>                      |                              |                                  |                                             |                                                 |
| Number of complaints                          |                              |                                  |                                             |                                                 |
| 0                                             | 6757 (39.7)                  | 11,015 (35.8)                    | 3451 (40.0)                                 | 3389 (39.3)                                     |
| 1                                             | 9807 (57.7)                  | 18,809 (61.1)                    | 4925 (57.1)                                 | 5014 (58.1)                                     |
| 2                                             | 416 (2.4)                    | 906 (2.9)                        | 235 (2.7)                                   | 216 (2.5)                                       |
| ≥3                                            | 28 (0.1)                     | 63 (0.2)                         | 20 (0.2)                                    | 12 (0.1)                                        |
| Chest pain                                    | 6650 (39.1)                  | 10,927 (35.5)                    | 3176 (36.8)                                 | 3158 (36.6)                                     |
| Dyspnoea                                      | 1562 (9.2)                   | 2275 (7.4)                       | 778 (9.0)                                   | 759 (8.8)                                       |
| Fatigue                                       | 531 (3.1)                    | 1060 (3.4)                       | 277 (3.2)                                   | 273 (3.2)                                       |
| Heart murmurs                                 | 158 (0.9)                    | 353 (1.1)                        | 77 (0.9)                                    | 75 (0.9)                                        |
| Palpitations                                  | 1697 (10.0)                  | 5924 (19.2)                      | 1088 (12.6)                                 | 1141 (13.2)                                     |
| Collapse                                      | 130 (0.8)                    | 274 (0.9)                        | 63 (0.7)                                    | 76 (0.9)                                        |
| <b>Co-morbidities (n, %)</b>                  |                              |                                  |                                             |                                                 |
| Hypertension                                  | 7888 (46.4)                  | 7096 (23.0)                      | 3386 (39.2)                                 | 3310 (38.4)                                     |
| Diabetes mellitus                             | 3252 (19.1)                  | 806 (2.6)                        | 843 (9.8)                                   | 686 (7.9)                                       |

|                                                                      |                  |                  |                  |                  |
|----------------------------------------------------------------------|------------------|------------------|------------------|------------------|
| Dyslipidaemia                                                        | 6635 (39.0)      | 2244 (7.3)       | 2078 (24.1)      | 1957 (22.7)      |
| Cardiovascular diagnosis at baseline                                 | 3348 (19.7)      | 1427 (4.6)       | 1061 (12.3)      | 939 (10.9)       |
| <b>Clinical characteristics</b>                                      |                  |                  |                  |                  |
| Body mass index (kg/m <sup>2</sup> )                                 | 27.5 (4.7)       | 26.3 (4.5)       | 27.0 (4.5)       | 27.0 (4.7)       |
| Systolic blood pressure (mmHg)                                       | 148 (21)         | 140 (21)         | 146 (21)         | 146 (22)         |
| Total cholesterol (mmol/L)                                           | 5.23 (1.34)      | 5.61 (0.86)      | 5.53 (1.29)      | 5.62 (0.86)      |
| Low-density lipoprotein cholesterol (mmol/L)                         | 2.90 [2.10-3.80] | 3.40 [2.90-3.90] | 3.30 [2.50-4.20] | 3.30 [2.90-3.80] |
| High-density lipoprotein cholesterol (mmol/L)                        | 1.40 [1.10-1.80] | 1.40 [1.10-1.80] | 1.40 [1.10-1.80] | 1.40 [1.10-1.80] |
| Triglycerides (mmol/L)                                               | 1.60 [1.10-2.40] | 1.40 [0.90-2.00] | 1.50 [1.00-2.20] | 1.50 [1.00-2.20] |
| Estimated glomerular filtration rate (mL/min/1.73m <sup>2</sup> )    | 81 (27)          | 88 (28)          | 82 (27)          | 82 (28)          |
| <b>Medication prescriptions at baseline other than statins (n,%)</b> |                  |                  |                  |                  |
| History of cardiovascular medication use                             | 1706 (10.0)      | 2409 (7.8)       | 970 (11.2)       | 971 (11.3)       |
| Cardiovascular medication prescribed at baseline                     | 13,556 (79.7)    | 10,418 (33.8)    | 5798 (67.2)      | 5807 (67.3)      |
| Number of cardiovascular medications                                 |                  |                  |                  |                  |
| 0                                                                    | 2566 (15.1)      | 18,620 (60.5)    | 2256 (26.1)      | 2240 (26.0)      |
| 1-3                                                                  | 10,488 (61.7)    | 11,064 (35.9)    | 5316 (61.6)      | 5457 (63.2)      |
| 4-7                                                                  | 3892 (22.9)      | 1099 (3.6)       | 1048 (12.1)      | 924 (10.7)       |
| 8-10                                                                 | 62 (0.4)         | 10 (0.0)         | 11 (0.1)         | 10 (0.1)         |
| Blood pressure lowering medication                                   | 12,436 (73.1)    | 10,768 (35.0)    | 5388 (62.4)      | 5352 (62.0)      |
| Antiplatelet or anticoagulant medication                             | 8552 (50.3)      | 3432 (11.1)      | 3086 (35.8)      | 3032 (35.1)      |
| Other lipid-lowering medication                                      | 348 (2.0)        | 267 (0.9)        | 187 (2.2)        | 191 (2.2)        |
| Diabetes mellitus medication                                         | 3068 (18.0)      | 604 (2.0)        | 728 (8.4)        | 572 (6.6)        |
| Nitrates                                                             | 3074 (18.0)      | 604 (2.0)        | 859 (10.0)       | 803 (9.3)        |
| Anti-arrhythmic medication                                           | 179 (1.1)        | 334 (1.1)        | 108 (1.3)        | 121 (1.4)        |
| Digoxin                                                              | 128 (0.8)        | 133 (0.4)        | 62 (0.7)         | 65 (0.8)         |
| <b>Statin prescriptions at baseline (n, %)</b>                       |                  |                  |                  |                  |
| Statin name                                                          |                  |                  |                  |                  |
| Atorvastatin                                                         | 3790 (22.3)      |                  | 1859 (21.5)      |                  |
| Fluvastatin                                                          | 90 (0.5)         |                  | 42 (0.5)         |                  |

|                                   |               |             |
|-----------------------------------|---------------|-------------|
| Pravastatin                       | 1241 (7.3)    | 643 (7.4)   |
| Rosuvastatin                      | 1735 (10.2)   | 889 (10.3)  |
| Simvastatin                       | 10,152 (59.7) | 5198 (60.2) |
| Statin intensity                  |               |             |
| Lower than guideline-recommended  | 5356 (31.5)   | 2805 (32.5) |
| Equal to guideline-recommended    | 6924 (40.7)   | 3473 (40.2) |
| Higher than guideline-recommended | 4728 (27.8)   | 2353 (27.3) |

Supplementary Table 3 Baseline characteristics of statin users and non-users before and after propensity score matching

|                                               | Low-intensity<br>statin users<br>(n = 5356) | High-intensity<br>statin users<br>(n = 11,652) | Low-intensity<br>statin users<br>after matching<br>(n = 5344) | High intensity<br>statin users<br>after matching<br>(n = 5344) |
|-----------------------------------------------|---------------------------------------------|------------------------------------------------|---------------------------------------------------------------|----------------------------------------------------------------|
| <b>General characteristics</b>                |                                             |                                                |                                                               |                                                                |
| Age (years)                                   | 63 (11)                                     | 62 (10)                                        | 64 (11)                                                       | 63 (10)                                                        |
| Women (n, %)                                  | 2861 (53.4)                                 | 5310 (45.6)                                    | 2850 (53.3)                                                   | 2732 (51.1)                                                    |
| Ethnicity (n, %)                              |                                             |                                                |                                                               |                                                                |
| Native Dutch                                  | 4236 (79.1)                                 | 8968 (77.0)                                    | 4225 (79.1)                                                   | 4181 (78.2)                                                    |
| First generation immigrant                    | 784 (14.6)                                  | 1947 (16.7)                                    | 783 (14.7)                                                    | 804 (15.0)                                                     |
| Second generation immigrant                   | 336 (6.3)                                   | 737 (6.3)                                      | 336 (6.3)                                                     | 359 (6.7)                                                      |
| Annual personal income (€)                    | 24,943 [11,115-43,595]                      | 27,528 [14,940-47,226]                         | 24,968 [14,078-43,619]                                        | 25,416 [14,094-44,117]                                         |
| Current smoker (n, %)                         | 2080 (38.8)                                 | 4159 (35.7)                                    | 2223 (41.6)                                                   | 2139 (40.0)                                                    |
| 10-year cardiovascular mortality risk (SCORE) |                                             |                                                |                                                               |                                                                |
| 0-4%                                          | 1695 (31.6)                                 | 3865 (33.2)                                    | 2466 (46.1)                                                   | 2544 (47.6)                                                    |
| 5-9%                                          | 1038 (19.4)                                 | 2199 (18.9)                                    | 1611 (30.1)                                                   | 1627 (30.4)                                                    |
| ≥10%                                          | 813 (15.2)                                  | 1385 (11.9)                                    | 1267 (23.7)                                                   | 1173 (21.9)                                                    |
| <b>Complaints (n, %)</b>                      |                                             |                                                |                                                               |                                                                |
| Number of complaints                          |                                             |                                                |                                                               |                                                                |
| 0                                             | 2136 (39.9)                                 | 4621 (39.7)                                    | 2131 (39.9)                                                   | 2201 (41.2)                                                    |
| 1                                             | 3081 (57.5)                                 | 6726 (57.7)                                    | 3074 (57.5)                                                   | 3006 (56.2)                                                    |
| 2                                             | 130 (2.4)                                   | 286 (2.5)                                      | 130 (2.4)                                                     | 128 (2.4)                                                      |
| ≥3                                            | 9 (0.1)                                     | 19 (0.1)                                       | 9 (0.1)                                                       | 9 (0.1)                                                        |
| Chest pain                                    | 1975 (36.9)                                 | 4675 (40.1)                                    | 1974 (36.9)                                                   | 1969 (36.8)                                                    |
| Dyspnoea                                      | 554 (10.2)                                  | 1018 (8.7)                                     | 540 (10.1)                                                    | 514 (9.6)                                                      |
| Fatigue                                       | 162 (3.0)                                   | 369 (3.2)                                      | 161 (3.0)                                                     | 158 (2.9)                                                      |
| Heart murmurs                                 | 52 (1.0)                                    | 106 (0.9)                                      | 52 (1.0)                                                      | 53 (1.0)                                                       |
| Palpitations                                  | 583 (10.9)                                  | 1114 (9.6)                                     | 583 (10.9)                                                    | 554 (10.4)                                                     |
| Collapse                                      | 53 (1.0)                                    | 77 (0.7)                                       | 52 (1.0)                                                      | 44 (0.8)                                                       |
| <b>Co-morbidities (n, %)</b>                  |                                             |                                                |                                                               |                                                                |
| Hypertension                                  | 2544 (47.5)                                 | 5344 (45.9)                                    | 2568 (48.1)                                                   | 2511 (47.0)                                                    |

|                                                                      |                  |                  |                  |                  |
|----------------------------------------------------------------------|------------------|------------------|------------------|------------------|
| Diabetes mellitus                                                    | 1025 (19.1)      | 2227 (19.1)      | 1036 (19.4)      | 1052 (19.7)      |
| Dyslipidaemia                                                        | 1952 (36.4)      | 4683 (40.2)      | 1972 (36.9)      | 2016 (37.7)      |
| Cardiovascular diagnosis at baseline                                 | 861 (16.1)       | 2487 (21.3)      | 861 (16.1)       | 928 (17.4)       |
| <b>Clinical characteristics</b>                                      |                  |                  |                  |                  |
| Body mass index (kg/m <sup>2</sup> )                                 | 27.3 (4.7)       | 27.5 (4.6)       | 27.3 (4.7)       | 27.4 (4.7)       |
| Systolic blood pressure (mmHg)                                       | 148 (21)         | 147 (21)         | 148 (21)         | 148 (22)         |
| Total cholesterol (mmol/L)                                           | 5.17 (1.15)      | 5.26 (1.42)      | 5.17 (1.14)      | 5.16 (1.30)      |
| Low-density lipoprotein cholesterol (mmol/L)                         | 2.90 [2.20-3.60] | 2.90 [2.00-4.00] | 2.90 [2.20-3.70] | 2.80 [2.00-3.80] |
| High-density lipoprotein cholesterol (mmol/L)                        | 1.40 [1.10-1.80] | 1.40 [1.10-1.70] | 1.40 [1.10-1.80] | 1.40 [1.10-1.80] |
| Triglycerides (mmol/L)                                               | 1.60 [1.00-2.30] | 1.60 [1.10-2.40] | 1.60 [1.10-2.30] | 1.60 [1.10-2.30] |
| Estimated glomerular filtration rate (mL/min/1.73m <sup>2</sup> )    | 79 (27)          | 83 (28)          | 78 (27)          | 79 (27)          |
| <b>Medication prescriptions at baseline other than statins (n,%)</b> |                  |                  |                  |                  |
| History of cardiovascular medication use                             | 378 (8.9)        | 1228 (10.5)      | 478 (8.9)        | 500 (9.4)        |
| Cardiovascular medication prescribed at baseline                     | 4303 (80.3)      | 9253 (79.4)      | 4292 (80.3)      | 4268 (79.9)      |
| Number of cardiovascular medications                                 |                  |                  |                  |                  |
| 0                                                                    | 814 (15.2)       | 1752 (15.0)      | 813 (15.2)       | 820 (15.3)       |
| 1-3                                                                  | 3362 (62.8)      | 7126 (61.2)      | 3357 (62.8)      | 3314 (62.0)      |
| 4-7                                                                  | 1157 (21.6)      | 2735 (23.5)      | 1151 (21.5)      | 1198 (22.4)      |
| 8-10                                                                 | 23 (0.4)         | 39 (0.3)         | 23 (0.4)         | 12 (0.2)         |
| Blood pressure lowering medication                                   | 3877 (72.4)      | 8559 (73.5)      | 3866 (72.3)      | 3847 (72.0)      |
| Antiplatelet or anticoagulant medication                             | 2631 (49.1)      | 5921 (50.8)      | 2624 (49.1)      | 2600 (48.7)      |
| Other lipid-lowering medication                                      | 80 (1.5)         | 268 (2.3)        | 80 (1.5)         | 100 (1.9)        |
| Diabetes mellitus medication                                         | 960 (17.9)       | 2108 (18.1)      | 959 (17.9)       | 980 (18.3)       |
| Nitrates                                                             | 810 (15.1)       | 2264 (19.4)      | 809 (15.1)       | 824 (15.4)       |
| Anti-arrhythmic medication                                           | 59 (1.1)         | 120 (1.0)        | 59 (1.1)         | 54 (1.0)         |
| Digoxin                                                              | 51 (1.0)         | 76 (0.7)         | 47 (0.9)         | 40 (0.7)         |
| <b>Statin prescriptions at baseline (n, %)</b>                       |                  |                  |                  |                  |
| Statin name                                                          |                  |                  |                  |                  |
| Atorvastatin                                                         | 1 (0.0)          | 3789 (32.5)      | 1 (0.1)          | 1722 (32.2)      |

|                                   |              |             |              |             |
|-----------------------------------|--------------|-------------|--------------|-------------|
| Fluvastatin                       | 90 (1.7)     | 0 (0.0)     | 89 (1.7)     | 0 (0.0)     |
| Pravastatin                       | 1241 (23.2)  | 0 (0.0)     | 1239 (23.2)  | 0 (0.0)     |
| Rosuvastatin                      | 0 (0.0)      | 1735 (14.9) | 0 (0.0)      | 788 (14.7)  |
| Simvastatin                       | 4024 (75.1)  | 6128 (52.6) | 4015 (75.1)  | 2834 (53.0) |
| Statin intensity                  |              |             |              |             |
| Lower than guideline-recommended  | 5356 (100.0) | 0 (0.0)     | 5344 (100.0) | 0 (0.0)     |
| Equal to guideline-recommended    | 0 (0.0)      | 6924 (59.4) | 0 (0.0)      | 3235 (60.5) |
| Higher than guideline-recommended | 0 (0.0)      | 4728 (40.6) | 0 (0.0)      | 2109 (39.5) |

Supplementary Table 4 Baseline characteristics of low- and high-intensity statin users before and after propensity score matching



|                          | <b>Whole population</b><br>(n =15,180) | <b>Women</b><br>(n =7930) | <b>Men</b><br>(n = 7250) |
|--------------------------|----------------------------------------|---------------------------|--------------------------|
| All-cause mortality      |                                        |                           |                          |
| No statin (ref)          | 1                                      | 1                         | 1                        |
| Statin                   | 0.78 (0.72-0.84)                       | 0.68 (0.60-0.77)          | 0.89 (0.81-0.97)         |
| Cardiovascular mortality |                                        |                           |                          |
| No statin (ref)          | 1                                      | 1                         | 1                        |
| Statin                   | 0.78 (0.66-0.90)                       | 0.58 (0.41-0.75)          | 1.02 (0.86-1.18)         |

Supplementary Table 5 Adjusted hazard ratios for the risk of all-cause and cardiovascular mortality associated with statin use stratified by sex in those without a cardiovascular diagnosis at baseline
